# Supplementary material for: TGEV infection up-regulates FcRn expression via activation of NF-κB signaling
Source: PubMed Central journal article supplement (PMC4995372; doi:10.1038/srep32154), 2016-08-24
Supplement: srep32154-s1.pdf [file srep32154-s1.pdf]

# **TGEV infection up-regulates FcRn expression via activation of NF- $\kappa$ B signaling**

Jinyue Guo<sup>a</sup>, Fei Li<sup>a</sup>, Shaoju Qian<sup>a</sup>, Dingren Bi<sup>a, b</sup>, Qigai He<sup>a, b</sup>, Hui Jin<sup>a, b</sup>, Rui Luo<sup>a, b</sup>, Shaowen Li<sup>a, b</sup>, Xianrong Meng<sup>a, b</sup>, Zili Li<sup>a, b, \*</sup>

<sup>a</sup> College of Veterinary Medicine, Huazhong Agricultural University, Wuhan 430070, China

<sup>b</sup> State Key Laboratory of Agricultural Microbiology, Huazhong Agricultural University, Wuhan 430070, China

\*Corresponding authors.

Tel: +86-27-87288917; Fax: +86-27-87280208;

E-mails: lizili@mail.hzau.edu.cn (Z.L.)

**Fig. S1 Analysis of NF-κB transcription factor binding sites in the**

**5'-flanking region of the pFcRn.** The pFcRn-1, pFcRn-2, pFcRn-3 and pFcRn-4 fragments used in the luciferase reporter gene assay. NF-κB binding sites that we analyzed in this study (NF-κB-1286, -1128, -894, -642 and -563) are highlighted in yellow. Predicted transcription start sites have been indicated in the red frame.

**| pFcRn-1> (-1381)**

GCTATAGCTCTGATTTCGACCCCTAACCTGGGAACCTCCATGTGCCGTGGGT

**NF-κB-1286**

GTGGCCCTAAAAAGCAAAGCAAAAAACAAAACAAAAAAT**GGGAG**

**TTTCC**ATTTCCGCTCGGTGTGTTAAGAACCCGACTGAGGTTCTTATCAGGGA

TGCAAGTTCAATCCCTGGCCTCACTCAGTGGGTAAAGGATCCCGCATTGTT

**| pFcRn-2> (-1150)**

ATGGCTGTGGTATAGGCTGATATCTACAGCTTCAGCTGGACCCGTAGCCT**GG**

**NF-κB-1128**

**GAACTTCC**AGATGCCGCATGGCATGTATTGCTGTAAAAAGGAAAAGAACA

AAAAACAAATTGCACACACACGCACGCAACACACACTCAACTTAGACAC

AGATGTTACAGCAGCATTATTTACTACAGCCAAAAAGTGAAACGACCCAA

ATGCCCATCAGTTGATTAATGAATCCACAAAATGTGGTTGATCCAGACAATA

**NF-κB-894**

GAATATTATTCACCCATAGAAAGAAATTA**AGGGAGTTCC**TTGGTGGCTCTGT

GGTTTAAGGATCTGGGATCACTGCTGCGGCTCTGATTACACCTGTGGTTTG

GATTTGATCCCTGGCCAGGAAATTCTGCACGACCTAGGCGAGGCCAAAA

AAGAAATGAAGTTTTGACACATGGTACCACATGCATAAATCTTGAAAACAG

TATTGGACATGGTGAAAAAGCCAGACACAAAACGGCACCATATTGTAGGA

**NF-κB-642**

TTCCATTTCTCTGAAAATCCAGAAGA**GGCAAATTCC**TAGAGACAGAACGTA

**| pFcRn-3> (-577)**

CACATCGGTGATTGCCAGGAGCCGAGGGGAGCAGCGGGGCTACTTAAAGG

**NF-κB-563**

GGTA**CGGGGTCTCC**TTGGGGATGATGAAAAGGTTCTGGAAGTACTAGGTAGTGG

CCGTGGTGGCACAACAGAGAAGGCGCTAAATGTCACCAACAGGAACGCTT

TTGTTTTGTGCATTTTACCGCAATAAAACGGATGAATGGAAGCATTATAGCG

GGAGTGTGGGCTGCGGGGGTGGGTGGGGGGGTTGGAAGAGGCCCCCAAG

CACGAAGGTATATCAGGACTCTGTTACTGAGGTCCTATCAGAAGCTATCAA

AGTACCGCAGGAGCACTTTAAGGGTACCCTGGGGGAGGGGTTCAAAGGAG

GAAGTGTGGAAGTATCTGGAAGACTTATCACAGCAGGAGCCAGTGAAGAC

**| pFcRn-4> (-208)**

**transcription start site-1**

CTGGGGGGGGTGTGACGAGGTAAGAAGGGGGCC**TGCGCCGATCTCTAA**

**AGGTGGGGCTCCGATAAGGTTGACTCCCAACGTTGTCATGAATTTGCTGGA**
